# Supplementary material
Source: PubMed Central journal article supplement (PMC4451052)
Supplement: NIHMS690706-supplement-01.pdf [file NIHMS690706-supplement-01.pdf]

## Table S1. Resources for Further Reading

|                           | Title                                                                                                     | Description                                                                                                 | PMID               |
|---------------------------|-----------------------------------------------------------------------------------------------------------|-------------------------------------------------------------------------------------------------------------|--------------------|
| 1. Network Reconstruction | A protocol for generating a high-quality genome-scale metabolic reconstruction                            | 96 step standard operating procedure for construction and curation of metabolic network reconstructions     | PMC3125167         |
|                           | The Biomass Objective Function                                                                            | Guide to accurately formulating the biomass objective function for calculation of cellular growth using FBA | PMC2912156         |
|                           | Towards multidimensional genome annotation                                                                | Procedure for going from a genome annotation to a functional model using constraints based methods          | 16418748           |
|                           | Reconstruction of biochemical networks in microorganisms                                                  | Comprehensive review of process used to build and validate a metabolic network reconstruction               | 19116616           |
|                           | Reconstructing the metabolic network of a bacterium from its genome                                       | How to improve a metabolic network reconstruction using high-throughput data, gene-context and phylogeny    | 16169729           |
|                           | Software platforms to facilitate reconstructing genome-scale metabolic networks                           | Review of software tools used for building a metabolic network reconstruction                               | 24148076           |
| 2. Prediction using GEMs  | What is flux balance analysis?                                                                            | Primer on the theoretical basis and practical application of flux balance analysis                          | PMC3108565         |
|                           | Quantitative prediction of cellular metabolism with constraint-based models: the COBRA Toolbox (1.0, 2.0) | Two step-by-step guides to using the COBRA toolbox for quantitative prediction of cellular metabolism       | 17406635, 21886097 |
|                           | Applications of genome-scale metabolic reconstructions                                                    | A review of the uses of metabolic network reconstructions                                                   | 19888215           |
|                           | BiGG: a Biochemical Genetic and Genomic knowledgebase of large scale metabolic reconstructions            | Database of available metabolic network reconstructions                                                     | 20426874           |
|                           | Automated genome annotation and metabolic model reconstruction in the SEED and Model SEED                 | Database of automatically generated metabolic network reconstructions                                       | 20802497           |
| 3. Model improvement      | Systematizing the generation of missing metabolic knowledge                                               | Review of gap-filling procedure and source of algorithms and software tools used for gap-filling analyses   | 20589842           |
|                           | Systems approach to refining genome annotation                                                            | Example of in-silico gap-filling approach combine with experimental validation for biological discovery     | 17088549           |

|                                           |                                                                                                                       |                                                                                                                                              |          |
|-------------------------------------------|-----------------------------------------------------------------------------------------------------------------------|----------------------------------------------------------------------------------------------------------------------------------------------|----------|
|                                           | GrowMatch: an automated method for reconciling in silico/in vivo growth predictions                                   | Automated approach for comparing and resolving model vs experimental inconsistencies                                                         | 19282964 |
| 4. Quantitative phenotype prediction      | In silico predictions of Escherichia coli metabolic capabilities are consistent with experimental data                | Carbon source and oxygen uptake rates match predicted optimal ratios by FBA                                                                  | 11175725 |
|                                           | Escherichia coli K-12 undergoes adaptive evolution to achieve in silico predicted optimal growth.                     | Carbon source and oxygen uptake rates evolve to predicted optimal ratios for cases when the wild-type strain does not match predicted values | 12432395 |
|                                           | Multidimensional optimality of microbial metabolism                                                                   | Metabolic fluxes from multiple bacteria operate close to Pareto-optimal surface of three competing objectives                                | 22556256 |
|                                           | Optknock: a bi-level programming framework for identifying gene knockout strategies for microbial strain optimization | One of the first algorithms for strain design in metabolic engineering using genome-scale metabolic models                                   | 14595777 |
| 5. Multi-omic data integration            | Constraining the metabolic genotype-phenotype relationship using a phylogeny of in silico methods                     | A recent review on constraint-based computational methods, including omics analysis methods                                                  | 22367118 |
|                                           | A community-driven global reconstruction of human metabolism                                                          | The most recent metabolic reconstruction of human metabolism                                                                                 | 23455439 |
|                                           | Using the reconstructed genome-scale human metabolic network to study physiology and pathology                        | A review on the use of the human metabolic reconstruction to study physiology and pathology                                                  | 22142339 |
| 6. Beyond metabolism to molecular biology | In silico method for modeling metabolism and gene product expression at genome scale.                                 | Integrated model of metabolism and gene expression for T. maritima                                                                           | 22760628 |
|                                           | Genome-scale models of metabolism and gene expression extend and refine growth phenotype prediction.                  | Integrated model of metabolism and gene expression for E. coli                                                                               | 24084808 |
|                                           | Computing the functional proteome: recent progress and future prospects for genome-scale model                        | A perspective on the predictions possible with ME-Models and how the models will be expanded and refined                                     | 25576845 |

|  |                                                                                                    |                                |          |
|--|----------------------------------------------------------------------------------------------------|--------------------------------|----------|
|  | Three-dimensional structural view of the central metabolic network of <i>Thermotoga maritima</i> . | GEM-PRO for <i>T. maritima</i> | 19762644 |
|  | Structural systems biology evaluation of metabolic thermotolerance in <i>Escherichia coli</i> .    | GEM-PRO for <i>E. coli</i>     | 23744946 |
